# Supplementary material for: Super-resolution visualization of chromatin loop folding in human lymphoblastoid cells using interferometric photoactivated localization microscopy
Source: PubMed Central journal article supplement (PMC9122977; doi:10.1038/s41598-022-12568-9), 2022-05-20
Supplement: 41598_2022_12568_MOESM1_ESM.pdf [file 41598_2022_12568_MOESM1_ESM.pdf]

 README.md

# ChromoLooping

Code and data in this repository comes from publication *Super-resolution visualization of chromatin loop folding in human lymphoblastoid cells using interferometric photoactivated localization microscopy*

You can use UCSF Chimera or any other viewer to visualize models and points in .pdb format.

## Installation Guide

Requirements for Python packages can be found in **requirements.txt**

Requirements:

- Python 3.6 or later
- [Jupyter Notebook](#)
- [UCSF Chimera](#) or other visualization software

The installation on desktop computer shouldn't take longer than 30 minutes.

The easiest way to run the code is to open Jupyter notebooks:

```
$ git clone https://github.com/SFGLab/ChromoLooping.git
$ cd ChromoLooping
$ jupyter notebook
```

...and select one of the two available **.ipynb** files:

- [statistics and image data processing](#)
- [modelling pipeline](#)

The existing examples in Jupyter notebooks can also be viewed directly on GitHub.

## Jupyter Notebooks

All examples of usage of the full processing pipeline step by step can be found in Jupyter notebooks. In notebook **image\_statistics.ipynb** you can find all the operations on ASCII files with image peaks exported from PeakSelector:

- reading and processing iPALM data from ASCII files
- statistics
- plotting histograms
- plotting convex hull

## Basic statistics for single iPALM image

```
In [4]: stats.print_statistics(image=image)
33292185.477251135
639699.1535913193
Group Count: 115
Peak Count: 1483
Average peaks per group 12.895652173913044
Average sigma X: 9.152259705196006 nm
Average sigma Y: 13.023146327283655 nm
Average sigma Z: 5.397415140616225 nm
Convex hull volume: 33292185.477251135
Convex hull area: 639699.1535913193
Average number of photons per peak: 9534.12137559002
Average number of photons per group peak: 146923.75652173912
Average sigma X per group peaks: 6.232244802608697 nm
Average sigma Y per group peaks: 6.549014719130437 nm
Average sigma Z per group peaks: 3.302540886956522 nm
```

## 3D plots

### 3D plots (peaks in 3D space and convex hull)

- all peaks - all blinking voxels recorded by iPALM microscopy
- filtered peaks - blinking voxels filtered by sigma parameter (peak position uncertainty)
- group peaks - detected oligo probes (after peaks clustering and choosing a representat for each cluster)

Convex hull volume is shown in nm<sup>3</sup>

```
In [5]: # all peaks
peaks = PeakPositions(image=image, sigma_threshold=None, minimize=True)
peaks.plot_peak_positions(title="All Image Peaks", outpath=None)
peaks.plot_convex_hull(title="All Peaks Convex Hull", outpath=None)
```

In `image_driven_modeling.ipynb` we put whole modeling procedure:

- exporting image peaks to .pdb format
- Traveling Salesman Problem solver
- Spline interpolation
- Calculating distance maps from 3D models
- Distance maps visualization

## Travelling Salesman Problem solving algorithm run on points in .pdb format saved from images files

### Saving peaks in .pdb format

```
In [1]: from peak_stats.reader.peaks import Image
from peak_stats.reader.read_peaks import Reader
from peak_stats.export_pdb.ascii_2_pdb import Points
from peak_stats.statistics.single_img_stats import GroupPeakStats
```

```
In [2]: ascii_file="data/ascii_files/Run1-647_c123_sum_X5_processed_jsa_IDL_ASCII_image21.txt"
```

```
In [3]: pdb_file = "data/example_image21/image21_group_peaks.pdb"
```

```
In [4]: reader = Reader(ascii_file)
image = Image(reader)
img_peaks = Points(image=image)
group_peaks = GroupPeakStats(image=image)
img_peaks.save_pdb(filename=pdb_file, points=group_peaks.positions)
```

### Travelling Salesman Problem solver

Run the Greedy TSP Solver on set of points in 3D space to find the shortest path connecting all points.

```
In [5]: from modeling_scripts.modeling_operations.create_structure import load_points, save_pdb
from modeling_scripts.modeling_operations.create_structure import run_image_tsp
from scipy.spatial.distance import squareform, pdist
```

```
In [6]: tsp_pdb = pdb_file[:-4] + " tsp.pdb"
in_points = load_points(infile=pdb_file)
graph = squareform(pdist(in_points))
arranged_points = run_image_tsp(graph=graph, points=in_points, endpoints=None, optimization_steps=10)
save_pdb(points=arranged_points, filename=tsp_pdb, connect=True)
```

File data/example\_image21/image21\_group\_peaks\_tsp.pdb saved...

```
Out[6]: 'data/example_image21/image21_group_peaks_tsp.pdb'
```

This tasks do not require any heavy computations and running the examples in Jupyter notebooks shouldn't exceed 5 minutes on a standard desktop computer.

## Data

The results from our work can be fully reproduced using the code from this repository.

All data files used in our publications are located in `data/ascii_files`.

All models obtained from our iPALM imaging are in `data/3d_models`. The models are in .pdb format and can be opened via USCF Chimera software.

example:

```
$ cd data/3d_models
$ chimera image7_smooth3331.pdb
```

The model will look like this:

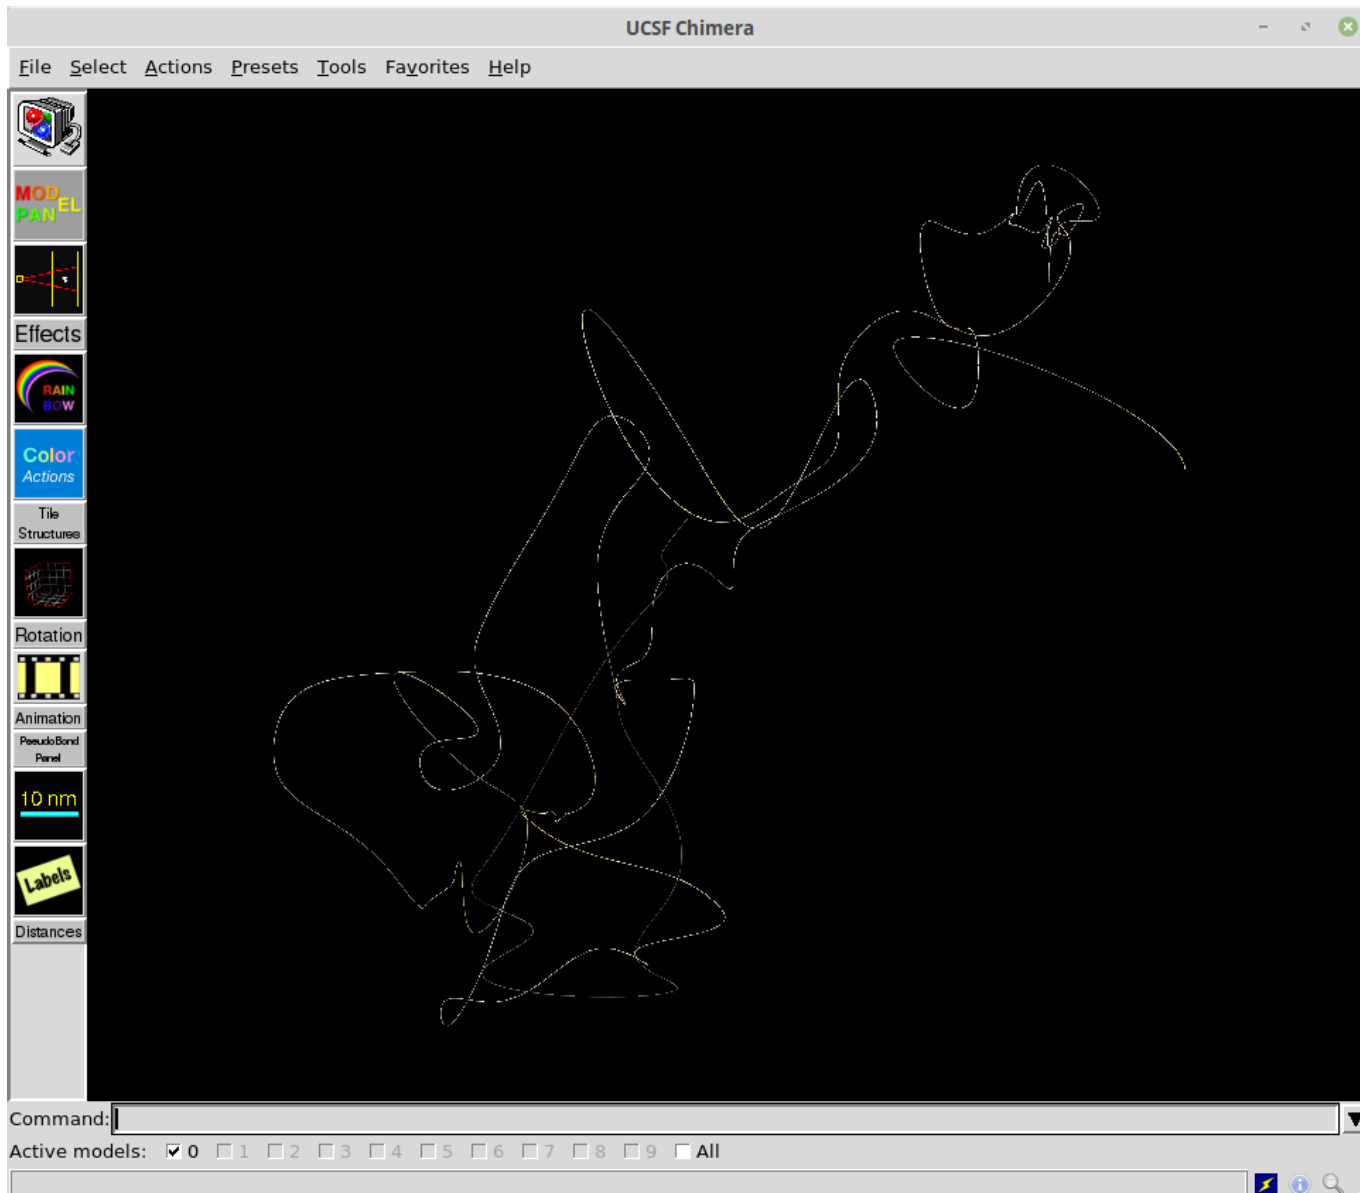

To get the presentation of the model as in our publication open the command line Favorites > Command Line and type two commands:

```
setattr m stickScale 8  
rainbow
```

Then you can rotate the model to desired orientation. The final result will look like this:

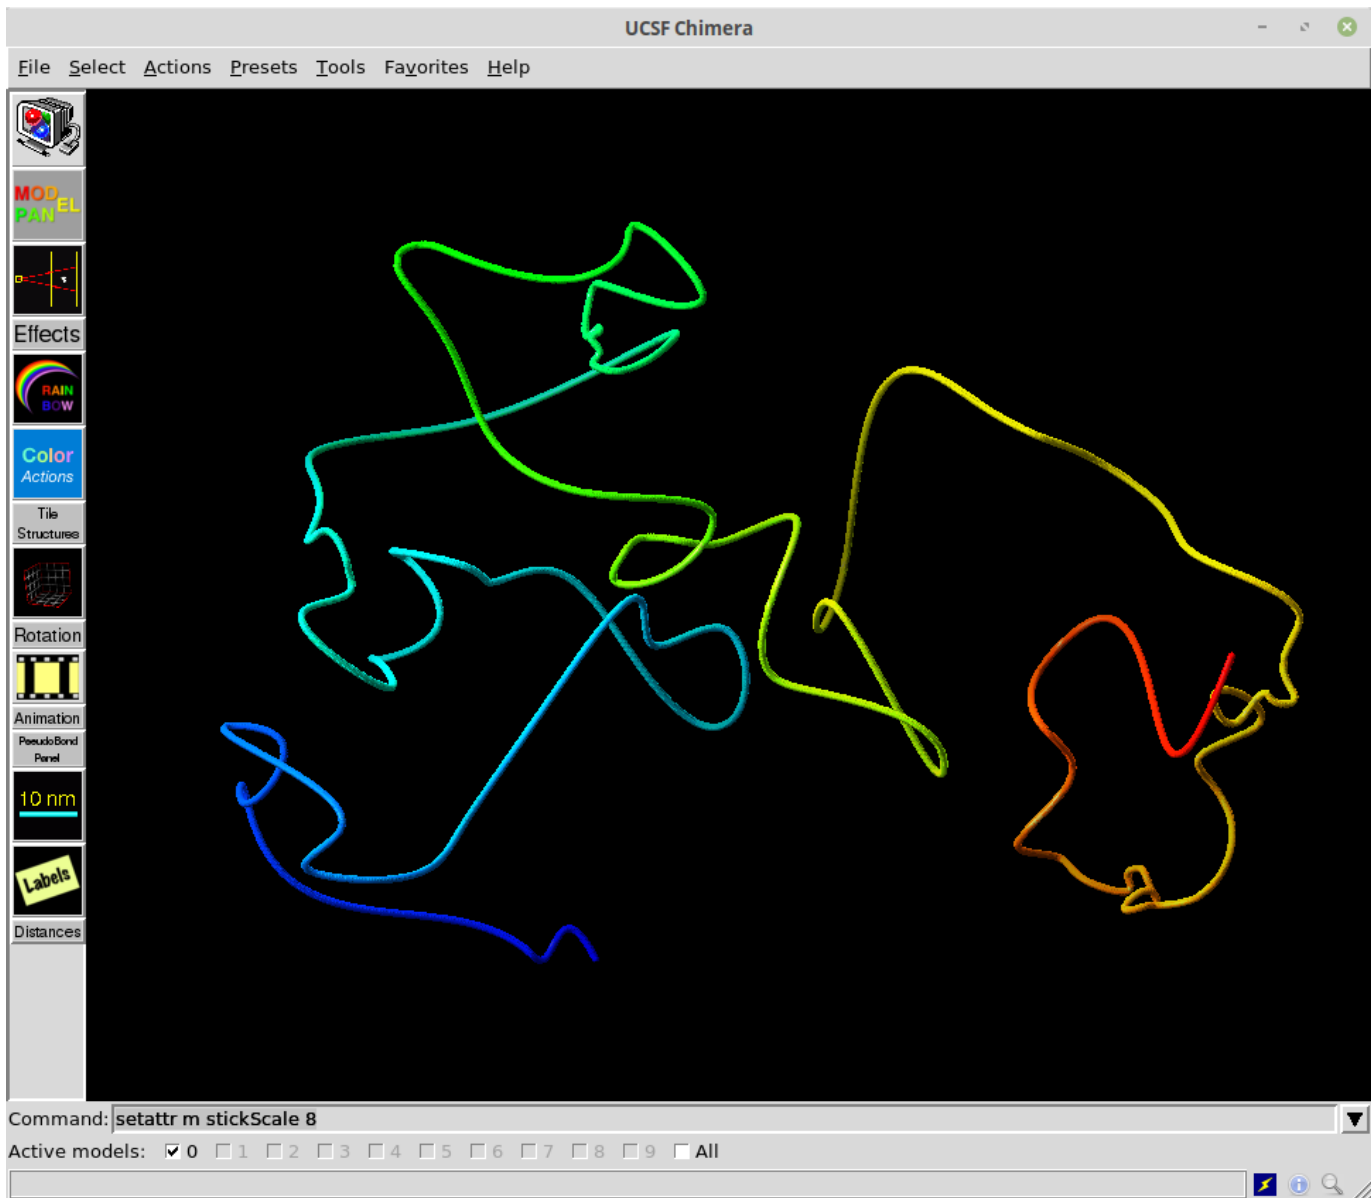

The example output data of full reconstruction of the image processing and modelling pipeline is located in `data/example_image_21`.
